# Supplementary material for: Self-Healing Alginate Hydrogel Formed by Dynamic Benzoxaborolate Chemistry Protects Retinal Pigment Epithelium Cells against Oxidative Damage
Source: MDPI journal article supplement (doi:10.3390/gels9010024), 2022-12-29
Supplement: s1 [file s1]

## Article

# Self-Healing Alginate Hydrogel Formed by Dynamic Benzoxaborolate Chemistry Protects Retinal Pigment Epithelium Cells against Oxidative Damage

Minhua Liu <sup>1,†</sup>, Yate Huang <sup>1,†</sup>, Chunwen Tao <sup>1</sup>, Weijia Yang <sup>1</sup>, Junrong Chen <sup>1</sup>, Li Zhu <sup>1</sup>, Tonghe Pan <sup>1</sup>, Ravin Narain <sup>4,\*</sup>, Kaihui Nan <sup>1,2,3,\*</sup> and Yangjun Chen <sup>1,2,3,\*</sup>

<sup>1</sup> State Key Laboratory of Ophthalmology, Optometry and Vision Science, School of Ophthalmology & Optometry, Wenzhou Medical University, Wenzhou, Zhejiang 325027, China

<sup>2</sup> National Engineering Research Center of Ophthalmology and Optometry, School of Biomedical Engineering, Wenzhou Medical University, Wenzhou, Zhejiang 325027, China

<sup>3</sup> National Clinical Research Center for Ocular Diseases, Affiliated Eye Hospital of Wenzhou Medical University, Wenzhou, Zhejiang 325027, China

<sup>4</sup> Department of Chemical and Materials Engineering, University of Alberta, Edmonton, Alberta T6G 2G6, Canada

† These two authors contributed equally to this work.

\* Correspondence: narain@ualberta.ca; nankh@163.com; chenyj@wmu.edu.cn

## Supporting Information

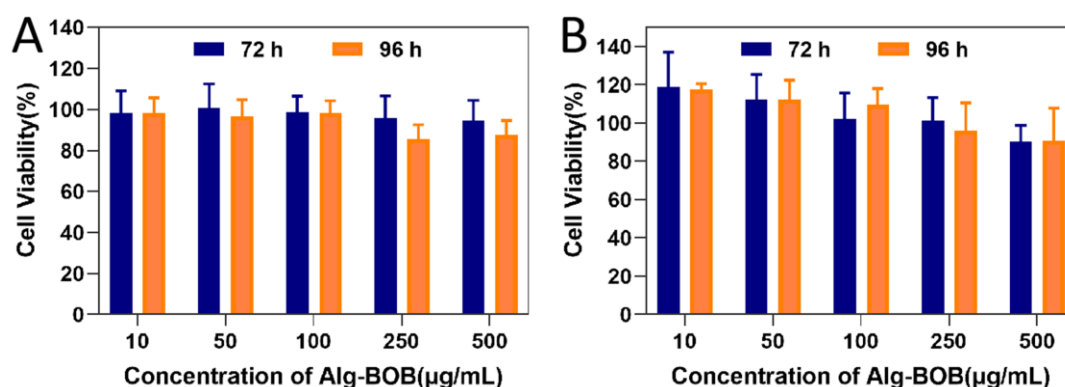

**Figure S1.** Cell viability of (A) ARPE-19 and (B) L929 cell lines after co-incubation with Alg-BOB polymer solution for a long time of 72 and 96 h, respectively ( $n = 6$ ).

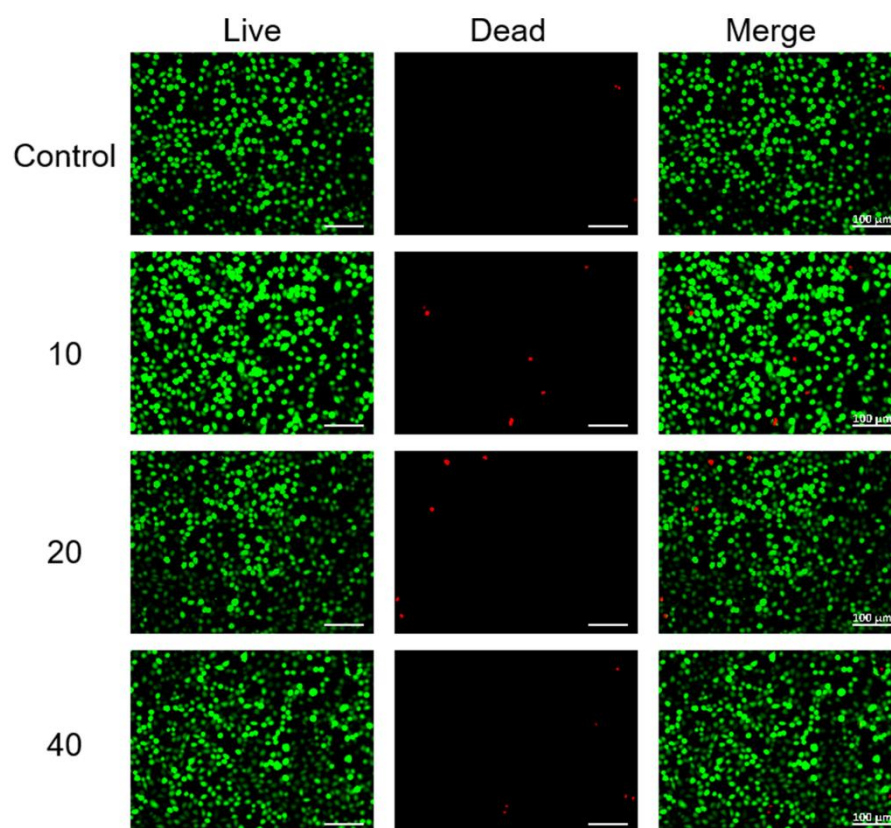

**Figure S2.** Live/Dead assay (green and red dots mean living and dead cells, respectively) of L929 cells cultured with gel extracts with different volume ratios of culture medium: hydrogel (10, 20, and 40, respectively). Scale bar = 100  $\mu\text{m}$ .

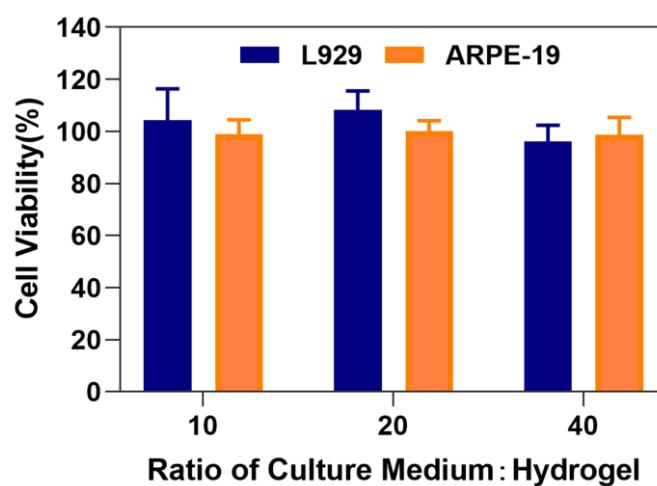

**Figure S3.** Cell viability of L929 and ARPE-19 cell lines after co-culture with gel extracts prepared by immersing the hydrogel in complete cell growth medium in presence of  $\text{H}_2\text{O}_2$  for 24 h ( $n = 6$ ).
